# Supplementary material for: Favorable Effects of Voriconazole Trough Concentrations Exceeding 1 μg/mL on Treatment Success and All-Cause Mortality: A Systematic Review and Meta-Analysis
Source: J Fungi (Basel). 2021 Apr 16;7(4):306. doi: 10.3390/jof7040306 (PMC8072959; doi:10.3390/jof7040306)
Supplement: Supplementary file 1 [file jof-07-00306-s001.zip › jof-1174708-supplementary.pdf]

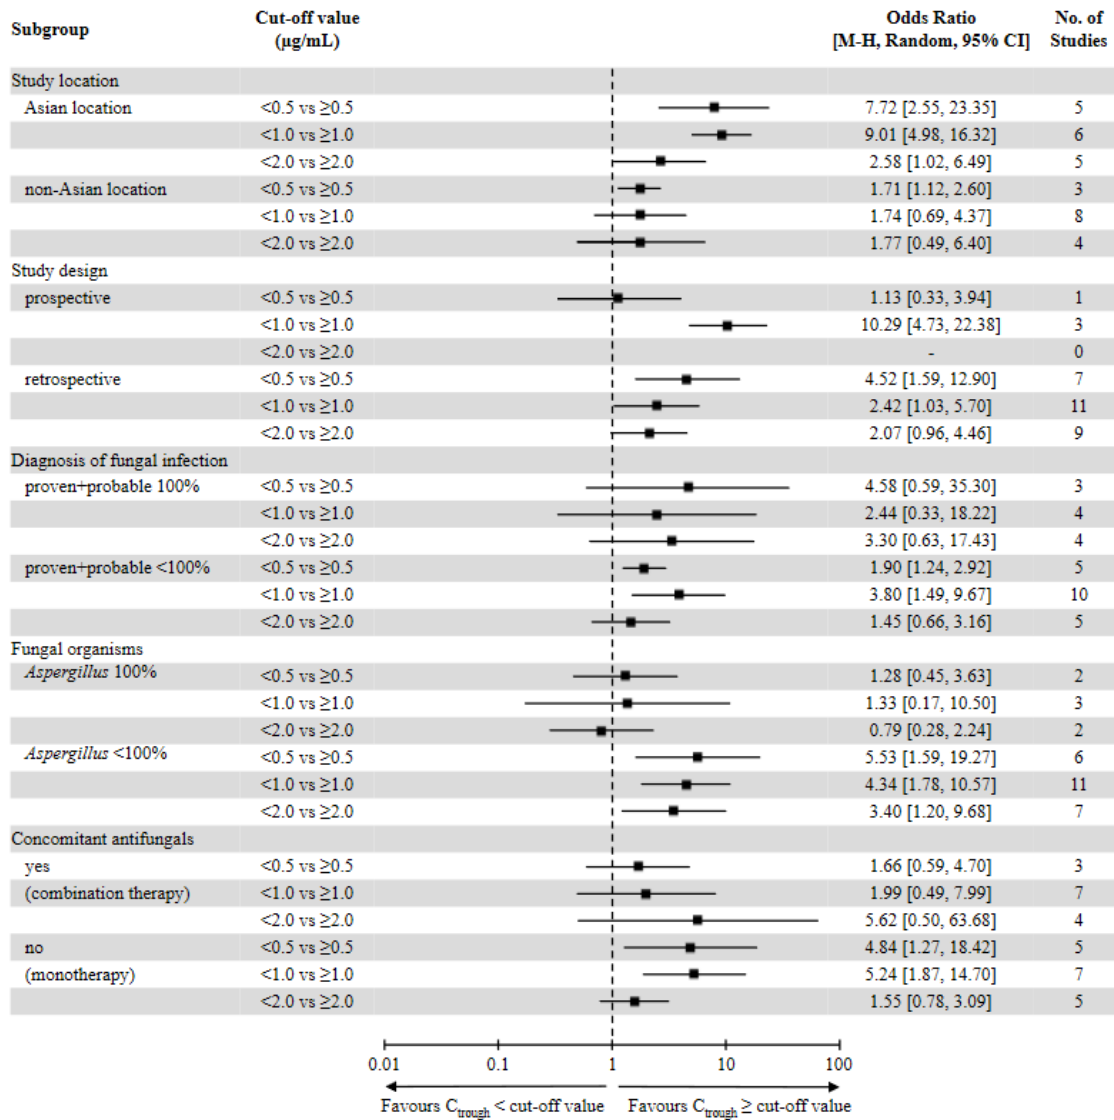

**Figure S1.** Summary of subgroup analyses for treatment success. Data are presented as forest plots of the odds ratios (ORs) for treatment success according to prespecified baseline subgroups. ORs and 95% confidence intervals (CIs) were calculated using the Mantel–Haenszel (M-H) method according to the random-effects (random) model.

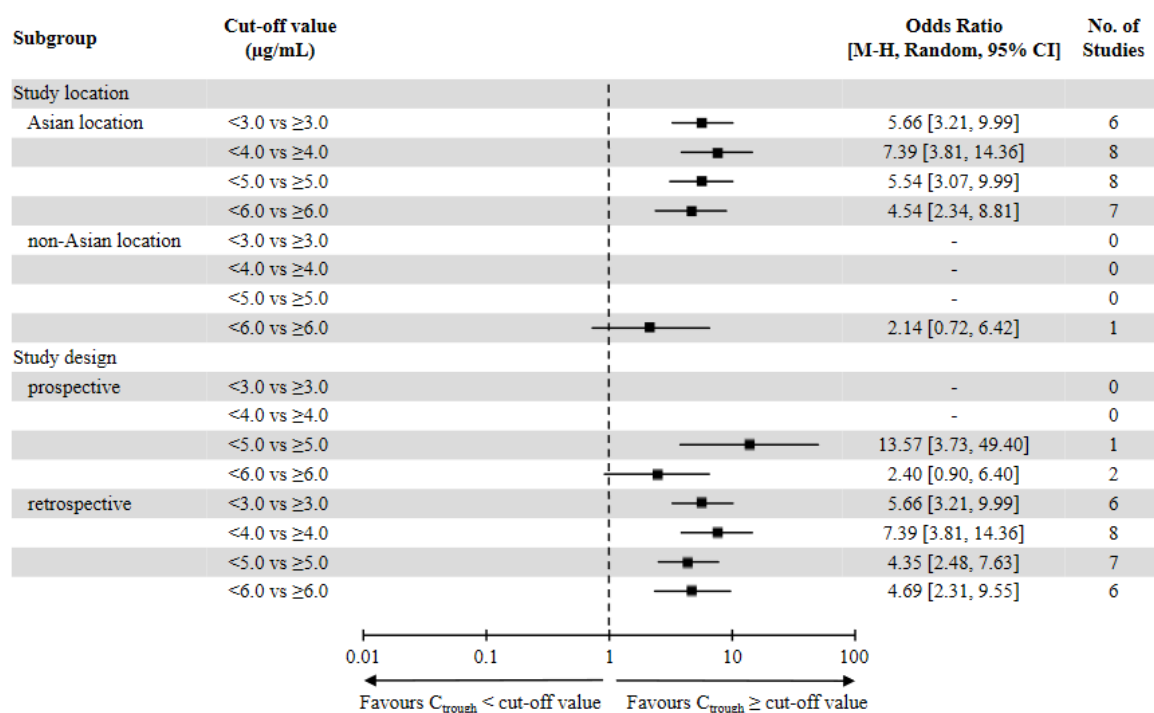

**Figure S2.** Summary of subgroup analyses for hepatotoxicity. Data are presented as forest plots of the odds ratios (ORs) for treatment success according to prespecified baseline subgroups. ORs and 95% confidence intervals (CIs) were calculated using the Mantel–Haenszel (M-H) method according to the random-effects (random) model.

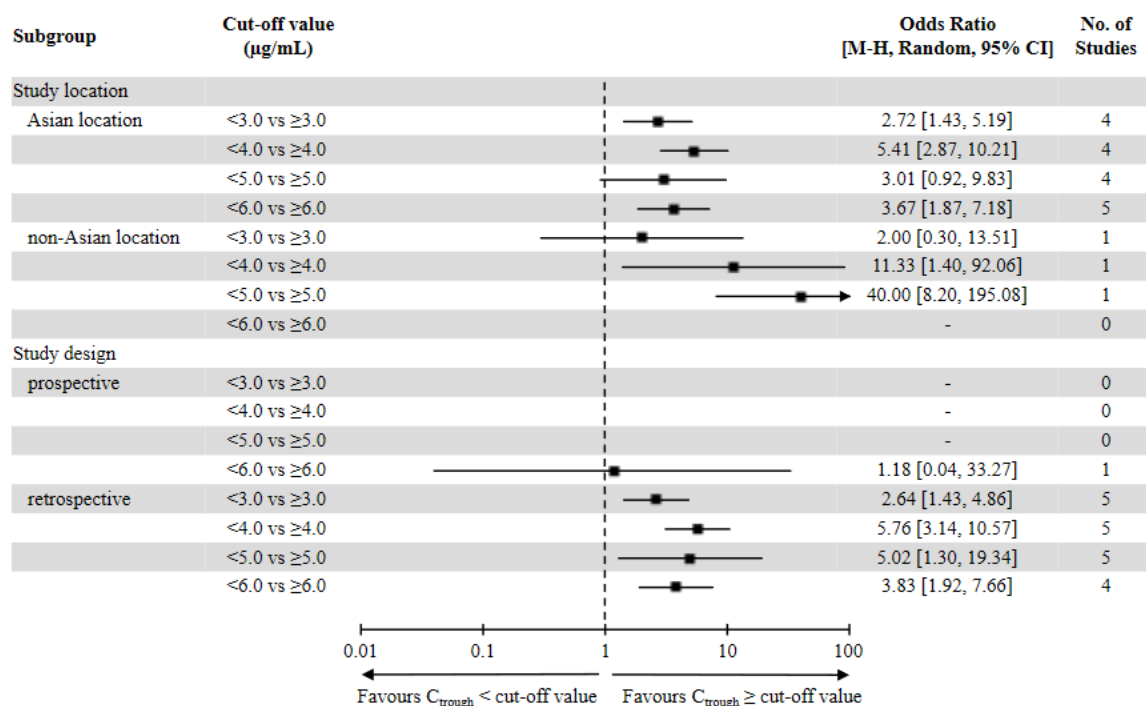

**Figure S3.** Summary of subgroup analyses for neurotoxicity. Data are presented as forest plots of the odds ratios (ORs) for treatment success according to prespecified baseline subgroups. ORs and 95% confidence intervals (CIs) were calculated using the Mantel–Haenszel (M-H) method according to the random-effects (random) model.
